# Supplementary material for: SWI/SNF and the histone chaperone Rtt106 drive expression of the Pleiotropic Drug Resistance network genes
Source: PubMed Central journal article supplement (PMC9005695; doi:10.1038/s41467-022-29591-z), 2022-04-12
Supplement: 41467_2022_29591_MOESM3_ESM.pdf [file 41467_2022_29591_MOESM3_ESM.pdf]

## **Descriptions of additional Supplementary Data files**

### Supplementary Data 1

ChIP-seq analysis of Rtt106 showing its binding to gene promoters in WT and its change in *pdr1Δ pdr3Δ*, *hir1Δ*, and *yta7Δ*. Colour codes are used as defined in Fig. 2e. Clusters and Promoter types are defined as in Figs. 2d and 2e.

### Supplementary Data 2

Rtt106-bound promoters showing regulated expression either in response to environmental changes or during the cell cycle.

### Supplementary Data 3

RNA-seq data showing changes in mRNA level in *rtt106Δ*, *pdr1Δ* and *pdr3Δ* compared to WT grown in YPD. FDR, false discovery rate; RPKM, reads per kilobase of transcript per million mapped reads.

### Supplementary Data 4

List of published papers examining *PDR5* expression dependence on Pdr1 and Pdr3.

### Supplementary Data 5

Proteins identified and quantified (by at least 5 ratio counts) by SILAC-based quantitative proteomic analysis of isolated minichromosomes. Data were analysed by MaxQuant software as described in Methods.

### Supplementary Data 6

Gene promoters bound by SWI/SNF and Rtt106. Promoters bound by SWI/SNF are defined based on Swi3 binding categorised into Clusters I and VI in Kubik et al. 2019. Promoters designated as Types A, B and C in this study are defined as Rtt106-bound promoters. Colour codes were used as in Fig. 6b.

### Supplementary Data 7

Oligonucleotides used in this study.
